# Supplementary material for: Association between Diet, Physical Activity and Nutritional Status of Male Border Guard Officers
Source: MDPI journal article supplement (doi:10.3390/ijerph19095305), 2022-04-27
Supplement: s1 [file s1]

**Table S1.** Food consumption frequency.

| Food groups                                                      | Percentage of consumption frequency* |    |    |    |    |    |    |   |
|------------------------------------------------------------------|--------------------------------------|----|----|----|----|----|----|---|
|                                                                  | 1                                    | 2  | 3  | 4  | 5  | 6  | 7  | 8 |
| Fruits, vegetables, and potatoes                                 |                                      |    |    |    |    |    |    |   |
| Fruits together—all types                                        | 0                                    | 1  | 1  | 11 | 6  | 51 | 27 | 3 |
| Stone fruits                                                     | 1                                    | 5  | 14 | 29 | 23 | 24 | 3  | 1 |
| Kiwi fruit and citrus                                            | 1                                    | 5  | 16 | 31 | 23 | 15 | 8  | 1 |
| Other tropical fruits                                            | 5                                    | 17 | 25 | 30 | 15 | 6  | 1  | 1 |
| Bananas                                                          | 2                                    | 1  | 10 | 22 | 22 | 32 | 10 | 1 |
| Apples and pears                                                 | 1                                    | 0  | 5  | 19 | 14 | 52 | 8  | 1 |
| Avocado                                                          | 38                                   | 25 | 20 | 7  | 5  | 5  | 0  | 0 |
| Olives                                                           | 27                                   | 16 | 27 | 16 | 6  | 7  | 1  | 0 |
| Dried fruits                                                     | 10                                   | 22 | 22 | 23 | 11 | 8  | 4  | 0 |
| Sweet fruit preserves and candied fruits                         | 8                                    | 21 | 26 | 22 | 11 | 10 | 2  | 0 |
| Vegetables—all types                                             | 0                                    | 0  | 2  | 10 | 7  | 49 | 29 | 3 |
| Crucifers                                                        | 1                                    | 1  | 8  | 32 | 25 | 30 | 2  | 1 |
| Yellow–orange vegetables                                         | 0                                    | 1  | 2  | 19 | 31 | 43 | 3  | 1 |
| Leafy green vegetables                                           | 0                                    | 2  | 9  | 29 | 29 | 27 | 4  | 0 |
| Tomatoes                                                         | 2                                    | 1  | 1  | 11 | 12 | 51 | 21 | 1 |
| Vegetables: fresh cucumbers, squash, zucchini, pumpkin, eggplant | 1                                    | 2  | 2  | 18 | 26 | 42 | 8  | 1 |
| Root vegetables and others                                       | 1                                    | 1  | 6  | 23 | 23 | 42 | 4  | 0 |
| Potatoes in various forms                                        | 1                                    | 2  | 7  | 15 | 11 | 55 | 8  | 1 |
| Seeds of legumes                                                 |                                      |    |    |    |    |    |    |   |
| Fresh seeds of legumes and canned ones                           | 4                                    | 7  | 25 | 38 | 17 | 9  | 0  | 0 |
| Dry seeds of legumes                                             | 7                                    | 17 | 34 | 32 | 8  | 2  | 0  | 0 |
| Cereal products                                                  |                                      |    |    |    |    |    |    |   |
| Wholemeal or with grains, so-called dark bread                   | 1                                    | 4  | 7  | 15 | 11 | 36 | 22 | 4 |
| Refined bread, so-called white bread                             | 2                                    | 4  | 4  | 12 | 12 | 33 | 27 | 6 |
| Unrefined groats coarse                                          | 0                                    | 5  | 15 | 27 | 21 | 30 | 2  | 0 |
| Refined cereal grain                                             | 2                                    | 4  | 14 | 28 | 24 | 27 | 1  | 0 |
| Ready-to-eat breakfast cereal products                           | 15                                   | 19 | 15 | 18 | 14 | 15 | 4  | 0 |
| Dairy products and eggs                                          |                                      |    |    |    |    |    |    |   |
| Milk and milk drinks                                             | 3                                    | 2  | 6  | 17 | 13 | 38 | 17 | 4 |
| Sweetened milk drinks                                            | 8                                    | 8  | 17 | 20 | 15 | 26 | 5  | 1 |
| Cottage cheese                                                   | 1                                    | 2  | 6  | 23 | 20 | 40 | 8  | 0 |
| Flavored cottage cheese                                          | 20                                   | 13 | 20 | 21 | 13 | 11 | 2  | 0 |
| Cheese                                                           | 2                                    | 3  | 9  | 17 | 14 | 42 | 12 | 1 |
| Eggs and egg dishes                                              | 1                                    | 2  | 2  | 16 | 26 | 47 | 6  | 0 |
| Meat products and fish                                           |                                      |    |    |    |    |    |    |   |
| Sausages, different types                                        | 0                                    | 2  | 6  | 19 | 14 | 43 | 15 | 1 |
| High-quality cold cuts                                           | 0                                    | 1  | 4  | 12 | 11 | 51 | 21 | 0 |

|                                                           |    |    |    |    |    |    |    |    |
|-----------------------------------------------------------|----|----|----|----|----|----|----|----|
| Sausage products and offal                                | 9  | 14 | 20 | 28 | 14 | 13 | 2  | 0  |
| Red meat                                                  | 1  | 6  | 12 | 37 | 19 | 22 | 2  | 1  |
| Poultry and rabbit                                        | 1  | 1  | 3  | 24 | 19 | 48 | 4  | 0  |
| Wild game meat                                            | 41 | 31 | 14 | 8  | 4  | 2  | 0  | 0  |
| Lean fish                                                 | 4  | 9  | 25 | 31 | 26 | 5  | 0  | 0  |
| Oily fish                                                 | 5  | 14 | 27 | 29 | 18 | 7  | 0  | 0  |
| Fats, nuts and grains                                     |    |    |    |    |    |    |    |    |
| Oil, all kinds                                            | 4  | 1  | 8  | 20 | 13 | 48 | 6  | 0  |
| Butter, all types                                         | 5  | 2  | 4  | 13 | 12 | 27 | 33 | 4  |
| Margarine, all types                                      | 32 | 13 | 11 | 11 | 8  | 14 | 9  | 2  |
| Cream, sweet or sour cream, for food or beverages         | 11 | 9  | 14 | 25 | 20 | 18 | 2  | 1  |
| Other animal fats                                         | 29 | 20 | 19 | 21 | 6  | 4  | 1  | 0  |
| Mayonnaise and dressings, i.e., salad dressings—all types | 7  | 12 | 21 | 36 | 12 | 10 | 1  | 1  |
| Nuts                                                      | 3  | 8  | 19 | 30 | 19 | 18 | 3  | 0  |
| Grains                                                    | 11 | 17 | 24 | 25 | 13 | 8  | 2  | 0  |
| Sweets and snacks                                         |    |    |    |    |    |    |    |    |
| Sugar to sweeten beverages                                | 31 | 3  | 5  | 10 | 5  | 10 | 24 | 12 |
| Honey to sweeten food and beverages                       | 20 | 16 | 14 | 19 | 11 | 15 | 5  | 0  |
| Chocolate, chocolate candies, and candy bars              | 3  | 5  | 13 | 24 | 15 | 34 | 5  | 1  |
| Non-chocolate candies                                     | 15 | 20 | 23 | 19 | 12 | 8  | 2  | 1  |
| Biscuits and cakes                                        | 2  | 12 | 21 | 24 | 17 | 23 | 1  | 0  |
| Ice cream and pudding                                     | 3  | 23 | 32 | 24 | 13 | 5  | 0  | 0  |
| Salty snacks                                              | 11 | 13 | 24 | 35 | 9  | 6  | 2  | 0  |
| Soft drinks                                               |    |    |    |    |    |    |    |    |
| Fruit juices and fruit nectars                            | 2  | 5  | 14 | 27 | 17 | 28 | 6  | 1  |
| Vegetable juices and vegetable-fruit ones                 | 10 | 18 | 20 | 19 | 18 | 14 | 0  | 1  |
| Energy drinks                                             | 53 | 15 | 14 | 10 | 3  | 2  | 2  | 1  |
| Sweetened sodas such as Fanta, Coca-Cola, Mirinda, Sprite | 19 | 14 | 19 | 25 | 8  | 13 | 2  | 0  |
| Alcoholic beverages                                       |    |    |    |    |    |    |    |    |
| Beer                                                      | 3  | 7  | 11 | 30 | 21 | 24 | 4  | 0  |
| Wine and drinks                                           | 9  | 23 | 23 | 25 | 14 | 5  | 1  | 0  |
| Vodka and spirits                                         | 12 | 20 | 32 | 21 | 11 | 4  | 0  | 0  |

\* Consumption frequency categories: 1—never or almost never; 2—once a quarter or less often; 3—once a month or less often; 4—a few times a month; 5—once a week; 6—several times a week; 7—every day; 8—several times a day.

**Table S2.** Relationships between diet (FFQ) and body mass index (BMI), fat mass index (FMI), visceral fat level (VFL), and bone mineral density (BMD T-score).

| Groups of products                                               | BMI      |        | FMI      |        | VFL      |        | BMD T-score |       |
|------------------------------------------------------------------|----------|--------|----------|--------|----------|--------|-------------|-------|
|                                                                  | Rho      | p      | Rho      | p      | Rho      | p      | Rho         | p     |
| <b>Food groups</b>                                               |          |        |          |        |          |        |             |       |
| Fruits, vegetables, and potatoes                                 | -0.234** | 0.002  | -0.294** | <0.001 | -0.216** | 0.005  | -0.160*     | 0.038 |
| Seeds of legumes                                                 | -0.190*  | 0.014  | -0.214** | 0.005  | -0.186*  | 0.016  | -0.060      | 0.437 |
| Cereal products                                                  | -0.084   | 0.277  | -0.112   | 0.148  | -0.135   | 0.081  | -0.124      | 0.107 |
| Dairy products and eggs                                          | -0.228** | 0.003  | -0.243** | 0.001  | -0.234** | 0.002  | -0.257**    | 0.001 |
| Meat products and fish                                           | 0.028    | 0.717  | 0.015    | 0.843  | 0.037    | 0.633  | -0.049      | 0.526 |
| Fats, nuts, and grains                                           | -0.157*  | 0.042  | -0.151   | 0.050  | -0.129   | 0.095  | -0.066      | 0.394 |
| Sweets and snacks                                                | -0.098   | 0.203  | -0.051   | 0.513  | -0.048   | 0.534  | 0.002       | 0.977 |
| Non-alcoholic beverages                                          | -0.068   | 0.380  | -0.059   | 0.446  | -0.103   | 0.182  | -0.087      | 0.259 |
| Alcoholic beverages                                              | 0.076    | 0.326  | 0.075    | 0.336  | 0.060    | 0.439  | 0.056       | 0.471 |
| <b>Selected products</b>                                         |          |        |          |        |          |        |             |       |
| Fruits, vegetables, and potatoes                                 |          |        |          |        |          |        |             |       |
| Fruits together - all types                                      | -0.175*  | 0.026  | -0.210** | 0.008  | -0.152   | 0.054  | -0.050      | 0.527 |
| Stone fruits                                                     | -0.125   | 0.106  | -0.154*  | 0.046  | -0.054   | 0.490  | -0.120      | 0.121 |
| Kiwi fruit and citrus                                            | -0.126   | 0.103  | -0.172*  | 0.025  | -0.128   | 0.098  | -0.039      | 0.616 |
| Other tropical fruits                                            | -0.276** | <0.001 | -0.346** | <0.001 | -0.276** | <0.001 | -0.133      | 0.089 |
| Bananas                                                          | -0.253** | 0.001  | -0.280** | <0.001 | -0.264** | 0.001  | -0.080      | 0.303 |
| Apples and pears                                                 | -0.087   | 0.262  | -0.124   | 0.109  | -0.059   | 0.450  | -0.052      | 0.505 |
| Avocado                                                          | -0.030   | 0.705  | -0.092   | 0.243  | -0.085   | 0.282  | -0.023      | 0.769 |
| Olives                                                           | -0.055   | 0.479  | -0.092   | 0.240  | -0.023   | 0.770  | -0.095      | 0.225 |
| Dried fruits                                                     | -0.137   | 0.077  | -0.248** | 0.001  | -0.185*  | 0.017  | -0.058      | 0.457 |
| Sweet fruit preserves and candied fruits                         | -0.152*  | 0.049  | -0.200** | 0.009  | -0.207** | 0.007  | -0.014      | 0.858 |
| Vegetables - all types                                           | -0.208** | 0.009  | -0.251** | 0.002  | -0.227** | 0.004  | -0.116      | 0.149 |
| Crucifers                                                        | -0.124   | 0.110  | -0.190*  | 0.014  | -0.114   | 0.141  | -0.037      | 0.631 |
| Yellow-orange vegetables                                         | -0.181*  | 0.019  | -0.215** | 0.005  | -0.172*  | 0.026  | -0.218**    | 0.004 |
| Leafy Green vegetables                                           | -0.217** | 0.005  | -0.245** | 0.001  | -0.160*  | 0.039  | -0.133      | 0.085 |
| Tomatoes                                                         | -0.102   | 0.187  | -0.175*  | 0.024  | -0.106   | 0.171  | -0.167*     | 0.030 |
| Vegetables: fresh cucumbers, squash, zucchini, pumpkin, eggplant | -0.126   | 0.103  | -0.172*  | 0.025  | -0.124   | 0.108  | -0.060      | 0.437 |
| Root vegetables and others                                       | -0.076   | 0.324  | -0.100   | 0.194  | -0.056   | 0.471  | -0.123      | 0.112 |
| Potatoes in various forms                                        | -0.207** | 0.007  | -0.173*  | 0.025  | -0.137   | 0.076  | -0.167*     | 0.030 |
| Seeds of legumes                                                 |          |        |          |        |          |        |             |       |
| Fresh seeds of legumes and canned ones                           | -0.171*  | 0.027  | -0.179*  | 0.020  | -0.166*  | 0.031  | -0.059      | 0.447 |
| Dry seeds of legumes                                             | -0.120   | 0.122  | -0.169*  | 0.028  | -0.145   | 0.060  | 0.006       | 0.943 |
| Cereal products                                                  |          |        |          |        |          |        |             |       |
| Wholemeal or with grains, so-called dark bread                   | -0.017   | 0.831  | -0.105   | 0.175  | -0.057   | 0.460  | -0.041      | 0.595 |
| Refined bread, so-called white bread                             | 0.007    | 0.932  | 0.064    | 0.406  | 0.055    | 0.476  | -0.061      | 0.429 |
| Unrefined groats coarse                                          | -0.163*  | 0.034  | -0.188*  | 0.015  | -0.219** | 0.004  | -0.112      | 0.147 |

[illegible]

|                   |        |       |        |       |        |       |        |       |
|-------------------|--------|-------|--------|-------|--------|-------|--------|-------|
| Beer              | 0.051  | 0.513 | 0.046  | 0.558 | 0.019  | 0.806 | −0.031 | 0.686 |
| Wine and drinks   | −0.017 | 0.832 | −0.021 | 0.792 | −0.007 | 0.923 | 0.013  | 0.863 |
| Vodka and spirits | 0.081  | 0.293 | 0.091  | 0.239 | 0.078  | 0.315 | 0.130  | 0.092 |

---

Spearman's correlation; \*  $p < 0.05$ ; \*\*  $p < 0.01$ .
